# Supplementary material for: Very Early MoCA Can Predict Functional Dependence at 3 Months After Stroke: A Longitudinal, Cohort Study
Source: PubMed Central journal article supplement (PMC6798188; doi:10.3389/fneur.2019.01051), 2019-10-11
Supplement: Data_Sheet_1.pdf [file Data_Sheet_1.pdf]

## Supplemental Material

Very early MoCA can predict functional dependence at 3 months after stroke:

A longitudinal, cohort study.

### Authors:

Tamar Abzhandadze, MS<sup>1</sup>

Lena Rafsten, MS<sup>1,2</sup>

Åsa Lundgren Nilsson, PhD<sup>1,2</sup>

Annie Palstam, PhD<sup>1</sup>

Katharina S. Sunnerhagen, MD, PhD<sup>1,2</sup>

<sup>1</sup> Institute of Neuroscience and Physiology, Rehabilitation medicine, University of Gothenburg. Gothenburg, Sweden. Per Dubbsgatan 14, fl. 3, 413 45 Gothenburg, Sweden.

<sup>2</sup> Centre for Person-Centred Care (GPCC), University of Gothenburg. Gothenburg, Sweden.

Corresponding author: Tamar Abzhandadze. Address: Institute of Neuroscience and Physiology, Rehabilitation medicine, University of Gothenburg, Gothenburg, Sweden.

Per Dubbsgatan 14, fl. 3, 413 45 Gothenburg, Sweden. Fax number: +46 317412659, telephone number: +46 702622897, e-mail address: tamar.abzhandadze@gu.se.

**Supplemental tables:**

**Table I.** The algorithm for estimating mRS scores according to Riksstroke's five self-reported questions (adapted from Eriksson et al. <sup>1</sup>).

| mRS grade | Definition of adjusted translation, using Riksstroke questions    | Answer codes  |
|-----------|-------------------------------------------------------------------|---------------|
| 0-2       | Q1: not or only partly dependent on next of kin for help/support. | 1 or 3        |
|           | Q2: living in own home without community support.                 | 1             |
|           | Q3: can move around without help both indoors and outdoors.       | 1             |
|           | Q4: can manage toilet visits without assistance.                  | 1             |
|           | Q5: can manage to dress/undress without help.                     | 1             |
| 3         | Q1: entirely dependent on next of kin for help/support or         | 2,            |
|           | Q2: not living in own home without community support or           | 2, 3, 5, 6, 7 |
|           | Q3: cannot move around without help outdoors or                   | 2             |
|           | Q3: can move around without help at least indoors                 | 1 or 2        |
|           | Q4: can manage toilet visits without assistance                   | 1             |
|           | Q5: can manage to dress/undress without help                      | 1             |
| 4         | Q3: cannot move around without help indoors or                    | 3             |
|           | Q4: need help to go to the toilet or                              | 2             |
|           | Q5: need help dressing/undressing                                 | 2             |
| 5         | Q2: not living at home                                            | 3, 5, 6, 7    |
|           | Q3: need another person's help to move                            | 3             |
|           | Q4: need help to go to the toilet                                 | 2             |
|           | Q5: need help dressing/undressing                                 | 2             |

Q1: Are you today dependent on a family member/next-of-kin for help/support (1- partly dependent, 2- entirely dependent, 3 - no, not at all)?

Q2: Where are you staying now (1- in own home without community support, 2 - in own home with community support, 3- living in community facility, 5- in acute care hospital, 6 - other, 7 - in a geriatric/rehabilitation unit)?

Q3: How mobile are you (1 - I can move around without help both indoors and outdoors, 2 - I can move around without help indoors but not outdoors, 3 - I need another person's help to move)?

Q4: Do you receive help from anybody to go to the toilet (1 - I can manage toilet visits without assistance, 2- I need help to go to the toilet)?

Q5: Do you receive help with dressing/undressing (1 - I can manage dress/undress without help, 2- I need help dressing/undressing)?

**Table II.** The algorithm for calculating the six cognitive domains of the Montreal Cognitive Assessment<sup>2</sup>.

| Cognitive domain on Montreal Cognitive Assessment, (total score) | Task                                                                                                                       | Task specific score |
|------------------------------------------------------------------|----------------------------------------------------------------------------------------------------------------------------|---------------------|
| Short term memory, (5)                                           | The short-term memory recall task involves two learning trials of five nouns and delayed recall after approximately 5 min. | 5                   |
| Visuospatial abilities, (4)                                      | A clock-drawing task                                                                                                       | 3                   |
|                                                                  | A three-dimensional cube copy                                                                                              | 1                   |
| Executive functions, (4)                                         | An alternation task adapted from the Trail Making B task                                                                   | 1                   |
|                                                                  | A phonemic fluency task                                                                                                    | 1                   |
|                                                                  | A two-item verbal abstraction task                                                                                         | 2                   |
| Attention, concentration, and working memory, (6)                | A sustained attention task (target detection using tapping)                                                                | 1                   |
|                                                                  | A serial subtraction task                                                                                                  | 3                   |
|                                                                  | Digits forward and backward                                                                                                | 2                   |
| Language, (6)                                                    | A three-item confrontation naming task with low-familiarity animals                                                        | 3                   |
|                                                                  | Repetition of two syntactically complex sentences                                                                          | 2                   |
|                                                                  | The aforementioned fluency task                                                                                            | 1                   |
| Orientation to time and place, (6)                               | Date                                                                                                                       | 1                   |
|                                                                  | Month                                                                                                                      | 1                   |
|                                                                  | Year                                                                                                                       | 1                   |
|                                                                  | Day                                                                                                                        | 1                   |
|                                                                  | Place                                                                                                                      | 1                   |
|                                                                  | City                                                                                                                       | 1                   |

**Table III.** Independent variables entered into univariate logistic analysis.

| <b>Variable</b>                                                              | <b>Description</b>                                                                                                                                                                                                                                                                                                                                                                                               |
|------------------------------------------------------------------------------|------------------------------------------------------------------------------------------------------------------------------------------------------------------------------------------------------------------------------------------------------------------------------------------------------------------------------------------------------------------------------------------------------------------|
| Household, prior to stroke                                                   | 0 – Yes, lives alone, 1 – No, shares household                                                                                                                                                                                                                                                                                                                                                                   |
| Accommodation, prior to stroke                                               | 0 – Own accommodation without home help<br>1 – Own accommodation/arranged accommodation with help                                                                                                                                                                                                                                                                                                                |
| Previous stroke                                                              | 0 – No, 1 – Yes                                                                                                                                                                                                                                                                                                                                                                                                  |
| Diabetes                                                                     | 0 – No, 1 – Yes                                                                                                                                                                                                                                                                                                                                                                                                  |
| Age at stroke onset                                                          | Scale, range 19-97 years                                                                                                                                                                                                                                                                                                                                                                                         |
| Sex                                                                          | 1 – Men, 2 – Women                                                                                                                                                                                                                                                                                                                                                                                               |
| Length of hospital stay                                                      | Scale, range 0-45 days                                                                                                                                                                                                                                                                                                                                                                                           |
| Paresis, upper limb, right                                                   | 0 – No drift, limb holds for 90 (or 45) degrees for full 10 s.<br>1 – Drift, limb holds for 90 (or 45) degrees, but drifts down before full 10 s, but does not hit bed/other support.<br>2 – Some effort against gravity, limb cannot get to or maintain (if cued) 90 (or 45) degrees, drifts down to bed but has some effort against gravity.<br>3 – No effort against gravity, limb falls.<br>4 – No movement. |
| Paresis, upper limb, left                                                    | 0 – No drift, limb holds for 90 (or 45) degrees for full 10 s.<br>1 – Drift, limb holds for 90 (or 45) degrees, but drifts down before full 10 s, but does not hit bed/other support.<br>2 – Some effort against gravity, limb cannot get to or maintain (if cued) 90 (or 45) degrees, drifts down to bed but has some effort against gravity.<br>3 – No effort against gravity, limb falls.<br>4 – No movement. |
| Discharge destination from acute stroke unit                                 | 1 – Own accommodation<br>2 – Arranged accommodation<br>3 – Other acute clinic<br>4 – Geriatric/rehab unit                                                                                                                                                                                                                                                                                                        |
| NIHSS <sup>†</sup> at stroke onset, score range 0-19 points.                 | Quartiles:<br>Q <sub>1</sub> - 0<br>Q <sub>2</sub> - 2<br>Q <sub>3</sub> - 4                                                                                                                                                                                                                                                                                                                                     |
| BI <sup>‡</sup> assessed 36-48 h post stroke, score range 10-100 points.     | Quartiles:<br>Q <sub>1</sub> - 80<br>Q <sub>2</sub> - 95<br>Q <sub>3</sub> - 100                                                                                                                                                                                                                                                                                                                                 |
| MoCA <sup>§</sup> assessed 36-48 h post stroke, the score range 3-30 points. | Quartiles:<br>Q <sub>1</sub> - 21<br>Q <sub>2</sub> - 24<br>Q <sub>3</sub> - 27                                                                                                                                                                                                                                                                                                                                  |
| MoCA, short-term memory                                                      | Total score was used, range 0 – 5 points                                                                                                                                                                                                                                                                                                                                                                         |
| MoCA, visuospatial functions                                                 | Total score was used, range 0 – 4 points                                                                                                                                                                                                                                                                                                                                                                         |
| MoCA, executive functions                                                    | Total score was used, range 0 – 4 points                                                                                                                                                                                                                                                                                                                                                                         |

|                                     |                                          |
|-------------------------------------|------------------------------------------|
| MoCA, attention and working memory  | Total score was used, range 0 – 6 points |
| MoCA, language                      | Total score was used, range 0 – 6 points |
| MoCA, orientation in time and space | Total score was used, range 0 – 6 points |

Abbreviations: †NIHSS – National Institute of Health Stroke Scale, ‡BI – Barthel Index, §MoCA – Montreal Cognitive Assessment. Note: The total scores of the NIHSS, BI, and MoCA are categorized according to quartiles.

Table IV. Predictive characteristics of the total score of the Montreal Cognitive Assessment (MoCA) for functional dependence (mRS $\geq$ 3) three months after stroke.

| Model                  | Independent Variables | OR* (95 %CI <sup>†</sup> ) | P-value | AUC <sup>‡</sup> | Nagelkerke R <sup>2</sup> |
|------------------------|-----------------------|----------------------------|---------|------------------|---------------------------|
| <b>1</b> <sup>  </sup> | MoCA <sup>#</sup>     | 0.85 (0.80-0.90)           | <0.001  | 0.73             | 0.15                      |
| <b>2</b> <sup>**</sup> | MoCA                  | 0.92 (0.87-0.99)           | <0.05   | 0.83             | 0.39                      |

\*OR- odds ratio, <sup>†</sup> 95% CI - 95% confidence interval, <sup>‡</sup> AUC – area under a receiver operating characteristic curve. <sup>||</sup>Unadjusted model. <sup>\*\*</sup>Model adjusted for age at stroke onset, living arrangement prior to stroke, activities of daily living measured with the Barthel Index within 36-48 h after stroke. <sup>#</sup>MoCA – Montreal cognitive Assessment, score range 0-30 points.

**Supplemental figure:** Process for selecting independent variables for predicting functional dependence 3 months after stroke, n=305.

| Step 1. Univariable analyses, variables with $p \geq 0.25$ (red text) are eliminated. | Step 2. Multivariable analyses with Wald: backward statistics. Variables with $p \geq 0.05$ (red text) are eliminated | Step 3. Multivariable analysis only based on variables with $p \leq 0.05$ . Variable in red was not significant ( $p > 0.05$ ). | <b>FINAL Model: multivariable regression analyses model.</b> | Clinically important variables added to the FINAL model, one at the time. |
|---------------------------------------------------------------------------------------|-----------------------------------------------------------------------------------------------------------------------|---------------------------------------------------------------------------------------------------------------------------------|--------------------------------------------------------------|---------------------------------------------------------------------------|
| Household: alone/shared household                                                     | Household: alone/shared household                                                                                     | Household: alone/shared household                                                                                               |                                                              |                                                                           |
| Accommodation                                                                         | Accommodation                                                                                                         | Accommodation                                                                                                                   | <b>Accommodation</b>                                         |                                                                           |
| Previous stroke                                                                       | <b>Previous stroke</b>                                                                                                |                                                                                                                                 |                                                              | Previous stroke                                                           |
| Diabetes                                                                              | <b>Diabetes</b>                                                                                                       |                                                                                                                                 |                                                              |                                                                           |
| Age                                                                                   | Age                                                                                                                   | Age                                                                                                                             | <b>Age</b>                                                   |                                                                           |
| <b>Sex</b>                                                                            |                                                                                                                       |                                                                                                                                 |                                                              | Sex                                                                       |
| Length of hospital stay                                                               | <b>Length of hospital stay</b>                                                                                        |                                                                                                                                 |                                                              |                                                                           |
| <b>Paresis UL, right</b>                                                              |                                                                                                                       |                                                                                                                                 |                                                              |                                                                           |
| Paresis UL, left                                                                      | <b>Paresis UL, left</b>                                                                                               |                                                                                                                                 |                                                              |                                                                           |
| Discharge destination from acute stroke unit                                          | <b>Discharge destination from acute stroke unit</b>                                                                   |                                                                                                                                 |                                                              |                                                                           |
| NIHSS                                                                                 | <b>NIHSS</b>                                                                                                          |                                                                                                                                 |                                                              | NIHSS                                                                     |
| BI                                                                                    | BI                                                                                                                    | BI                                                                                                                              | <b>BI</b>                                                    |                                                                           |
| MoCA                                                                                  | MoCA                                                                                                                  | MoCA                                                                                                                            | <b>MoCA</b>                                                  |                                                                           |
| MoCA - Short term memory                                                              |                                                                                                                       |                                                                                                                                 |                                                              | MoCA - Short term memory                                                  |
| MoCA - Visuospatial Function                                                          |                                                                                                                       |                                                                                                                                 |                                                              | MoCA - Visuospatial Function                                              |
| MoCA - Executive Function                                                             |                                                                                                                       |                                                                                                                                 |                                                              | MoCA - Executive Function                                                 |
| MoCA - Attention and Working memory                                                   |                                                                                                                       |                                                                                                                                 |                                                              | MoCA - Attention and Working memory                                       |
| MoCA - Language                                                                       |                                                                                                                       |                                                                                                                                 |                                                              | MoCA - Language                                                           |
| MoCA - Orientation in time and place                                                  |                                                                                                                       |                                                                                                                                 |                                                              | MoCA - Orientation in time and place                                      |

Abbreviations: UL - upper limb, NIHSS - the National Institute of Health Stroke Scale, BI - Barthel index, MOCA - Montreal Cognitive Assessment.

## **References**

1. Eriksson M, Appelros P, Norrving B, Terént A, Stegmayr B. Assessment of Functional Outcome in a National Quality Register for Acute Stroke: Can Simple Self-Reported Items Be Transformed Into the Modified Rankin Scale? *Stroke*. 2007; 38:1384-1386.
2. Nasreddine ZS, Phillips NA, Bédirian V, Charbonneau S, Whitehead V, Collin I, et al. The Montreal Cognitive Assessment, MoCA: A brief screening tool for mild cognitive impairment. *J Am Geriatr Soc*. 2005; 53:695-699.
